# Supplementary material for: The Relationship Between Preoperative Oxford Hip and Knee Score and Change in Health-Related Quality of Life After Total Hip and Total Knee Arthroplasty: Can It Help Inform Rationing Decisions?
Source: PubMed Central journal article supplement — Arthroplast Today. 2020 May 21;6(3):585–589.e1. doi: 10.1016/j.artd.2020.04.009 (PMC7502579; doi:10.1016/j.artd.2020.04.009), 2020-05-21
Supplement: mmc1.pdf [file mmc1.pdf]

# INDIVIDUAL CONFLICT OF INTEREST STATEMENT

## *American Association of Hip and Knee Surgeons*

(Adopted from the American Academy of Orthopaedic Surgeons disclosure statement)

The following form **must be filled out completely and submitted by each author (example, 6 authors, 6 forms).**  
**All items require a response. If there is no relevant disclosure for a given item, enter "None."**

**The relationship between preoperative Oxford hip and knee score and change in health-related quality of life following total hip and total knee arthroplasty: Can it help inform rationing decisions?**

---

1. Royalties from a company or supplier (The following conflicts were disclosed) None
  
2. Speakers bureau/paid presentations for a company or supplier (The following conflicts were disclosed)  
None
  
- 3A. Paid employee for a company or supplier (The following conflicts were disclosed)  
None
  
- 3B. Paid consultant for a company or supplier (The following conflicts were disclosed)  
None
  
- 3C. Unpaid consultants for a company or supplier (The following conflicts were disclosed)  
None
  
4. Stock or stock options in a company or supplier (The following conflicts were disclosed)  
None
  
5. Research support from a company or supplier as a Principal Investigator (The following conflicts were disclosed)  
None
  
6. Other financial or material support from a company or supplier (The following conflicts were disclosed)  
The Orthopaedic Department receives an educational grant from DePuy Synthes to support an Arthroplasty fellowship
  
7. Royalties, financial or material support from publishers (The following conflicts were disclosed)  
None
  
8. Medical/Orthopaedic publications editorial/governing board (The following conflicts were disclosed)  
None
  
9. Board member/committee appointments for a society (The following conflicts were disclosed)  
None

David Gwynne-Jones

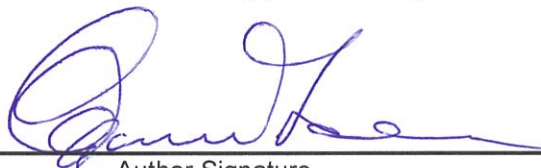

7 August 2019

---

Author Name (Print or Type)

Author Signature

Date
