# Supplementary material for: The Relationship Between Preoperative Oxford Hip and Knee Score and Change in Health-Related Quality of Life After Total Hip and Total Knee Arthroplasty: Can It Help Inform Rationing Decisions?
Source: PubMed Central journal article supplement — Arthroplast Today. 2020 May 21;6(3):585–589.e1. doi: 10.1016/j.artd.2020.04.009 (PMC7502579; doi:10.1016/j.artd.2020.04.009), 2020-05-21
Supplement: mmc3.pdf [file mmc3.pdf]

# INDIVIDUAL CONFLICT OF INTEREST STATEMENT

## *American Association of Hip and Knee Surgeons*

(Adopted from the American Academy of Orthopaedic Surgeons disclosure statement)

The following form **must be filled out completely and submitted by each author (example, 6 authors, 6 forms).**  
**All items require a response. If there is no relevant disclosure for a given item, enter "None."**

**The relationship between preoperative Oxford hip and knee score and change in health-related quality of life following total hip and total knee arthroplasty: Can it help inform rationing decisions?**

---

1. Royalties from a company or supplier (The following conflicts were disclosed) None
  
2. Speakers bureau/paid presentations for a company or supplier (The following conflicts were disclosed)  
None
  
- 3A. Paid employee for a company or supplier (The following conflicts were disclosed)  
None
  
- 3B. Paid consultant for a company or supplier (The following conflicts were disclosed)  
None
  
- 3C. Unpaid consultants for a company or supplier (The following conflicts were disclosed)  
None
  
4. Stock or stock options in a company or supplier (The following conflicts were disclosed)  
None
  
5. Research support from a company or supplier as a Principal Investigator (The following conflicts were disclosed)  
None
  
6. Other financial or material support from a company or supplier (The following conflicts were disclosed)  
None
  
7. Royalties, financial or material support from publishers (The following conflicts were disclosed)  
None
  
8. Medical/Orthopaedic publications editorial/governing board (The following conflicts were disclosed)  
None
  
9. Board member/committee appointments for a society (The following conflicts were disclosed)  
None

Ross Wilson



8 August 2019

---

Author Name (Print or Type)

Author Signature

Date
